# Supplementary material
Source: MDPI journal article supplement (https://www.mdpi.com/2673-6470/2/1/3)
Supplement: s1 [file s1]

## MEDLINE Search Strategy

1. "Aged, 80 and over"/ or aged/ or frail elderly/
2. (Old\* adj1 (adult\* or age\* or people or person\*)).mp.
3. (Elder\* adj1 (adult\* or age\* or people or person\*)).mp.
4. (("65" or sixtyfive or sixty-five or "sixty five") adj3 (above or over)).mp.
5. (Senior adj1 (citizen\* or people or resident\*)).mp.
6. "frail elderly".mp.
7. or/1-6
8. homes for the aged/ or nursing homes/ or assisted living facilities/ or residential facilities/
9. ("Long term care" or "Aged care" or "Nursing home").mp.
10. ((Gerontologic\* or "old age") adj1 (care\* or facilit\* or home\*)).mp.
11. (Residential adj2 (care or facilit\* or home\*)).mp.
12. (Assisted adj1 (care or living)).mp.
13. (Retirement adj1 (care or facilit\* or home\*)).mp.
14. (Boarding adj1 (home\* or house\*)).mp.
15. or/8-14
16. Information Technology/ or computer communication network/ or internet access/ or computers, handheld/ or Wireless Technology/ or internet/ or Mobile Applications/ or social networking/ or social media/ or smart phone/ or computer/ or cell phone/ or online social networking/ or online systems/ or text messaging/
17. (Wifi or wireless or "wi fi" or online).mp.
18. (SMS or "short message service\*" or "text messag\*").mp.
19. (Computer or ipad or iphone or android).mp.
20. Streaming service\*.mp.
21. ((mobile or Cell or smart) adj2 (app\* or phone\* or technolog\*)).mp.
22. (Social adj1 (media or network\*)).mp.
23. (ICT or "Information adj2 technolog\*").mp.
24. or/16-23
25. 7 and 15 and 24
