# Supplementary material
Source: MDPI journal article supplement (https://www.mdpi.com/2673-6470/2/1/3)
Supplement: s1 [file s1]

Archive with 2 entries (2 files):
- Supplementary Material File S1.pdf
- Supplementary Material File S2.pdf
